# Supplementary material
Source: PubMed Central journal article supplement (PMC9500118)
Supplement: NIHMS1783238-supplement-1.pdf [file NIHMS1783238-supplement-1.pdf]

**Supplementary Table 1.** Clinical data of NCI IBMFS participants with an SDS-like phenotype.

|                                                                                  | <b>SDS-like</b>         |
|----------------------------------------------------------------------------------|-------------------------|
| <b>Number of Cases</b>                                                           | <b>7</b>                |
| <b>Sex (Male:Female)</b>                                                         | <b>1.3:1</b>            |
| <b>Median age at diagnosis in years (range)<sup>a</sup></b>                      | <b>2.13 (1.03-3.23)</b> |
| <b><u>Vital Status (Alive, Deceased)</u></b>                                     | <b>7, 0</b>             |
| <b>Disease-specific death</b>                                                    | -                       |
| <b>Treatment-related death</b>                                                   | -                       |
| <b>Malignant disease</b>                                                         | -                       |
| <b>Age at death in years, median (range)</b>                                     | -                       |
| <b>All Hallmark SDS Features</b>                                                 | <b>0% (0/2)</b>         |
| <b>Pancreatic Insufficiency</b>                                                  | <b>100% (3/3)</b>       |
| <b>History of Neutropenia</b>                                                    | <b>66.6% (4/6)</b>      |
| <b>Skeletal Dysplasia<sup>b</sup></b>                                            | <b>33.3% (1/3)</b>      |
| <b>Hematologic Malignancy, MDS/AML (N)</b>                                       | <b>No</b>               |
| <b>MDS/AML Median age in years (range)</b>                                       | -                       |
| <b>Frequent Cytogenetic Abnormalities of MDS/AML</b>                             | -                       |
| <b>Other Solid Cancer, Age at diagnosis, years</b>                               | <b>No</b>               |
| <b>Immune Dysfunction<sup>c</sup></b>                                            | <b>17% (1/6)</b>        |
| <b>Failure to Thrive</b>                                                         | <b>100% (3/3)</b>       |
| <b>GI Symptoms<sup>d</sup></b>                                                   | <b>100% (3/3)</b>       |
| <b>Steatorrhea</b>                                                               | <b>100% (1/1)</b>       |
| <b>Elevated Liver Transaminases</b>                                              | <b>100% (1/1)</b>       |
| <b>Malabsorption</b>                                                             | <b>100% (3/3)</b>       |
| <b>Received Nutritional Assistance via Tube Feedings, Parental Nutrition (N)</b> | <b>1, 0</b>             |
| <b>Developmental Delay/Learning Disabilities<sup>e</sup></b>                     | <b>100% (1/1)</b>       |
| <b>Microcephaly</b>                                                              | <b>0% (0/2)</b>         |
| <b>Short Stature</b>                                                             | <b>100% (4/4)</b>       |
| <b>Cardiac Abnormalities<sup>f</sup></b>                                         | <b>100% (1/1)</b>       |
| <b>Dermatologic Findings<sup>g</sup></b>                                         | <b>100% (1/1)</b>       |

<sup>a</sup>Date of SDS diagnosis was based on physician report, when available. Genetic testing report date confirmed the date of diagnosis if no earlier medical records were available.

<sup>b</sup>Skeletal dysplasia findings include severe thoracic dystrophy, metaphyseal dysostosis, scoliosis, short arms, short legs, small hands, other bony abnormalities in the extremities, or other rib cage/thoracic malformations.

<sup>c</sup>Immunodeficiency as defined in Methods.

<sup>d</sup>GI symptoms include a history of malabsorption, malnutrition, steatorrhea, gastroesophageal reflux disease (GERD), liver disease, liver steatosis, and/or liver cirrhosis.

<sup>e</sup>Psychodevelopmental findings include ADHD/ADD, speech delay, depression, anxiety, Asperger's syndrome, Bipolar disorder, PTSD, OCD, dyslexia, auditory processing disorder, sensory integration dysfunction, and anger issues.

<sup>f</sup>Cardiac abnormalities include ventricular septal defect, patent foramen ovale, atrial septal defect, patent ductus arteriosus, and other heart malformations (*e.g.*, cardiomegaly).

<sup>g</sup>Dermatologic findings include eczema, café au lait spots, hypopigmentation, hyperpigmentation, ichthyosis, petechiae, xerosis, ecchymosis, atopic dermatitis, subcutaneous lupus erythematosus, pityriasis alba, dermatofibroma, xanthelasma, psoriasis, hyperkeratosis, and keratosis pilaris.

**Supplementary Table 2.** Hematologic findings in NCI IBMFS SDS-like cohorts.

|                                                                         | <b>SDS-like</b>  |
|-------------------------------------------------------------------------|------------------|
| <b>Total Number</b>                                                     | <b>7</b>         |
| <b>Neutropenia at Diagnosis</b>                                         | 25% (1/4)        |
| <b>Median ANC at Diagnosis (cells/<math>\mu</math>L) (Range)</b>        | 2400 (1390-6890) |
| <b>Thrombocytopenic at Diagnosis</b>                                    | 0% (0/4)         |
| <b>Median Platelet Count at Diagnosis (K/<math>\mu</math>L) (Range)</b> | 331 (237-383)    |
| <b>Anemic at Diagnosis</b>                                              | 0% (0/2)         |
| <b>Median Hemoglobin at Diagnosis (g/dL) (Range)</b>                    | 11.7 (10.9-14.1) |
| <b>Hypocellular for age at First BMBx</b>                               | 50% (2/4)        |
| <b>Median Cellularity at First Biopsy (Range)</b>                       | 63% (25-95%)     |
| <b>Cytogenetic Abnormalities of First Bone Marrow Aspirate</b>          | Del(20q) (N=2)   |
| <b>Hypocellular for age at Most Severe BMBx</b>                         | 75% (3/4)        |
| <b>Median Cellularity for Most Severe Biopsy (Range)</b>                | 58% (25-75%)     |
| <b>Cytogenetic Abnormalities of Most Severe Bone Marrow Aspirate</b>    | Del(20q) (N=1)   |

**Supplementary Table 3.** Details on genetic testing performed on participants with SDS and an unknown genetic variant in the NCI IBMFS Cohort.

| <b>NCI ID</b> | <b>PacBio</b> | <b>Exome</b> | <b>NGS</b> | <b>aCGH</b> | <b>External Genetic Testing</b> | <b>Samples Status</b> |
|---------------|---------------|--------------|------------|-------------|---------------------------------|-----------------------|
| NCI 21-1      |               |              |            |             |                                 | No samples            |
| NCI 37-1      |               |              |            |             |                                 | No samples            |
| NCI 37-2      |               |              |            |             |                                 | No samples            |
| NCI 42-1      | X             | X            |            | X           |                                 |                       |
| NCI 46-1      |               | X            |            |             | X                               |                       |
| NCI 104-1     | X             | X            | X          | X           | X                               |                       |
| NCI 104-2     | X             | X            | X          | X           | X                               |                       |
| NCI 178-1     | X             | X            | X          | X           | X                               |                       |
| NCI 190-1     |               |              |            |             | X                               | No samples            |
| NCI 205-1     | X             | X            | X          | X           | X                               |                       |
| NCI 337-1     | X             | X            |            | X           | X                               |                       |
| NCI 337-2     | X             | X            |            | X           |                                 |                       |
| NCI 466-1     |               |              |            |             |                                 | Yes, awaiting testing |
| NCI 480-1     |               | X            |            |             | X                               |                       |
| NCI 554-1     |               |              |            |             | X                               | Yes, awaiting testing |

**Supplementary Table 4.** Phenotypes of SDS reported from five cohorts in comparison with the NCI IBMFS cohort.<sup>5,35-39</sup>

|                                             | <b>NCI IBMFS Cohort SDS</b>                                                                                                          | <b>NCI IBMFS Cohort SDS-like</b>                        | <b>North American SDS Registry<sup>5</sup></b>                             | <b>Italian SDS Registry<sup>35</sup></b>                            | <b>French National Cohort of SDS Patients<sup>36</sup></b>                       | <b>Greek SDS Registry<sup>37</sup></b>                           | <b>Japanese SDS Cohort<sup>39</sup></b>        |
|---------------------------------------------|--------------------------------------------------------------------------------------------------------------------------------------|---------------------------------------------------------|----------------------------------------------------------------------------|---------------------------------------------------------------------|----------------------------------------------------------------------------------|------------------------------------------------------------------|------------------------------------------------|
| <b>Number of Participants with SDS (N)</b>  | 47                                                                                                                                   | 7                                                       | 37                                                                         | 121                                                                 | 102                                                                              | 11                                                               | 24                                             |
| <b>Sex (Male:Female)</b>                    | 0.74:1                                                                                                                               | 1.3:1                                                   | 1.85:1                                                                     | 1.33:1                                                              | 1.32:1                                                                           | 0.83:1                                                           | 1.67:1                                         |
| <b>Median age at diagnosis</b>              | 1.78 years                                                                                                                           | 2.13 years                                              | 3.5 years                                                                  | 1.3 years                                                           | 0.55 years                                                                       | 1.3 years                                                        | 1.6 years                                      |
| <b>Method of SDS Diagnosis</b>              | Genetic Testing: 68% Symptomatic: 100%                                                                                               | Genetic testing: 0% Symptomatic: 100%                   | Genetic testing: 100% Symptomatic: 51%                                     | Genetic testing and symptomatic : 100%                              | Genetic testing and symptomatic: 100%                                            | Genetic testing and symptomatic: 100%                            | Genetic testing and symptomatic (18/21, 85.7%) |
| <b>Neutropenia (ANC &lt; 1500 cells/uL)</b> | 100% (45/45)                                                                                                                         | 66.6% (4/6)                                             | 81% (30/37)                                                                | 59.9%, cumulative incidence                                         | 100% (102/102)                                                                   | 100%                                                             | 73.7% at diagnosis                             |
| <b>Pancreatic Insufficiency</b>             | 95.3% (41/43)                                                                                                                        | 100% (3/3)                                              | 100% (17/17)                                                               | 76.8% (93/121)                                                      | 100% (102/102)                                                                   | 64%                                                              | 75% (18/24)                                    |
| <b>Bony abnormalities</b>                   | 80.6% (29/36)                                                                                                                        | 33.3% (1/3)                                             | 38% (14/37)                                                                | 50.4%                                                               | 8.8% (9/102)                                                                     | 64%                                                              | -                                              |
| <b>Anemia</b>                               | 15% (6/40), at diagnosis                                                                                                             | 0% (0/2), at diagnosis                                  | 16% (6/37)                                                                 | 20.2%, cumulative incidence                                         | 12.7% (13/102), at diagnosis                                                     | 27%                                                              | 4.5% (1/24)                                    |
| <b>Thrombocytopenia</b>                     | 19% (8/42), at diagnosis                                                                                                             | 0% (0/4), at diagnosis                                  | 27% (10/37)                                                                | 66.8%, cumulative incidence                                         | 10.8% (11/102), at diagnosis                                                     | 36%                                                              | -                                              |
| <b>Notable Bone Marrow Biopsy Findings</b>  | 66.6% (20/30) hypocellular most severe BMBx; Del(7q) (N=1), Del(20q) (N=8), Isochromosome(Xp10)/(Xp22) (N=1), Mono 7/Del(20q) (N=1), | 75% (3/4) hypocellular most severe BMBx; Del(20q) (N=1) | 100% hypocellular (32/32); Cytogenetic abnormalities (N=7); Del(20q) (N=5) | 49% cytogenetic abnormalities; Most common, i(7)(q10) or del(20)(q) | Non-MDS/AML: Cytogenetic abnormalities (N=10); Del(20q)=5, Isochromosome 7 (N=3) | 2 with cytogenetic abnormalities; i(7)(q10) and del(X)(q24→qter) | -                                              |

|                                                                 |                                       |                        |             |                   |                |                                                                                                             |                                                                   |
|-----------------------------------------------------------------|---------------------------------------|------------------------|-------------|-------------------|----------------|-------------------------------------------------------------------------------------------------------------|-------------------------------------------------------------------|
|                                                                 | Isochromosome 7<br>(N=2)              |                        |             |                   |                |                                                                                                             |                                                                   |
| <b>GCSF Usage</b>                                               | N=12                                  | N=1                    | -           | 19%               | 16.7% (17/102) | 18%                                                                                                         | -                                                                 |
| <b>Severe GI Symptoms<br/>(Diarrhea, Steatorrhea,<br/>etc.)</b> | 85.7% (36/42)                         | 100% (3/3)             | 58% (21/37) | -                 | 18.6% (19/102) | -                                                                                                           | 73.9% at<br>diagnosis                                             |
| <b>Elevated liver function<br/>tests</b>                        | 88.9% (16/18)                         | 100% (1/1)             | 41% (15/37) | 61.9%<br>(75/121) | -              | 55%                                                                                                         | 36.4% (8/24)                                                      |
| <b>Required Nutritional<br/>Assistance</b>                      | Tube feedings<br>(N=12); TPN<br>(N=2) | Tube feedings<br>(N=1) | -           | -                 | 18.6% (19/102) | 55%                                                                                                         | MCT (5/24,<br>20.8%); IV<br>LCT (1/24,<br>4.2%)                   |
| <b>Short Stature</b>                                            | 90% (27/30)                           | 100% (4/4)             | -           | 60.3%<br>(73/121) | 58.8% (60/102) | 82%                                                                                                         | 4.5% (1/24)                                                       |
| <b>Cardiac Abnormalities</b>                                    | 43.5% (10/23)                         | 100% (1/1)             | 19% (7/37)  | -                 | 11.8% (12/102) | 27%                                                                                                         | -                                                                 |
| <b>Developmental<br/>Delay/Failure to Thrive</b>                | 58.8% (20/34)                         | 100% (1/1)             | 73% (27/37) | 50%               | 34% (25/73)    | 36%                                                                                                         | Developmental delay,<br>15.4%<br>(2/13); FTT,<br>50.5%<br>(11/24) |
| <b>Hematologic Malignancy</b>                                   | 3 MDS/2 AML                           | None                   | 2 MDS       | 10<br>MDS/AML     | 4 MDS/8 AML    | N=2; (1)<br>Malignant<br>definitive<br>severe<br>cytopenia and<br>(1) clonal bone<br>marrow<br>cytogenetics | 1 AML/1<br>MDS                                                    |
